# Supplementary material
Source: MDPI journal article supplement (https://www.mdpi.com/2254-9625/14/3/31)
Supplement: s1 [file s1]

**Table S1.** Checklist used to rate the clinical performance in managing a simulated case of sedation-associated respiratory arrest (English translation)

|                                                                    |
|--------------------------------------------------------------------|
| <b>INITIAL ASSESSMENT</b>                                          |
| Checking the patient's medical history                             |
| Review of sedative drugs already administered                      |
| <b>DIAGNOSIS</b>                                                   |
| Rapid recognition of oxygen desaturation                           |
| Rapid recognition of airway obstruction                            |
| Verbal stimulation                                                 |
| Pain stimulation                                                   |
| <b>MANAGEMENT (1)</b>                                              |
| No sedative drugs added                                            |
| Interruption of the procedure and request for assistance           |
| Increase in oxygen supply                                          |
| Appropriate patient positioning and cervical extension (chin lift) |
| Mandibular subluxation (jaw thrust)                                |
| Manual ventilation with positive pressure                          |
| <b>SECONDARY ASSESSMENT</b>                                        |
| Checking the satumeter (correctly installed and operational)       |
| Detection of leaks during manual ventilation                       |
| Checking the venous access (correctly installed and operational)   |
| Checking the suction (available and operational)                   |
| <b>MANAGEMENT (2)</b>                                              |
| Placement of an oro- or nasopharyngeal cannula                     |
| Consideration of the use of an invasive ventilation device         |
| Administration of an appropriate antidote                          |
